1 **R Functions for Analysis of Continuous Glucose Monitor Data**

2 Tim Vigers<sup>1,2,3\*</sup>, B.A., Christine L. Chan<sup>1</sup>, M.D., Janet Snell-Bergeon<sup>2</sup>, Ph.D., Petter Bjornstad<sup>1</sup>,  
3 M.D., Philip S. Zeitler<sup>1</sup>, M.D., Ph.D., Gregory Forlenza<sup>2</sup>, M.D., Laura Pyle<sup>1,2,3</sup>, Ph.D.

4  
5 <sup>1</sup>Department of Pediatric Endocrinology, University of Colorado School of Medicine, Aurora,  
6 Colorado, United States

7  
8 <sup>2</sup>Barbara Davis Center, University of Colorado School of Medicine, Aurora, Colorado, United  
9 States

10  
11 <sup>3</sup>Department of Biostatistics and Informatics, Colorado School of Public Health, Aurora,  
12 Colorado

13  
14  
15 \*Corresponding Author  
16 [Laura.pyle@ucdenver.edu](mailto:Laura.pyle@ucdenver.edu) (LP)

17

18 **Abstract:**

19           Continuous glucose monitoring (CGM) is an essential part of diabetes care. Real-time  
20 CGM data are beneficial to patients for daily glucose management, and aggregate summary  
21 statistics of CGM measures are valuable to direct insulin dosing and as a tool for researchers in  
22 clinical trials. Yet, the various commercial systems still report CGM data in disparate, non-  
23 standard ways. Accordingly, there is a need for a standardized, free, open-source approach to  
24 CGM data management and analysis. Functions were developed in the free programming  
25 language R to provide a rapid, easy, and consistent methodology for CGM data management and  
26 analysis. Summary variables calculated by our package compare well to those generated by  
27 various CGM software, and our functions provide a more comprehensive list of summary  
28 measures available to clinicians and researchers. Consistent handling of CGM data using our R  
29 package may facilitate collaboration between research groups and contribute to a better  
30 understanding of free-living glucose patterns.

31

## 32 **Introduction**

33           Continuous glucose monitoring (CGM) technology has transformed diabetes care over  
34 the past 15 years by allowing clinicians to measure free-living glucose patterns. During this  
35 period, CGM use has increased from < 5% of patients to almost 50% in some age groups [1].  
36 With recent reports detailing the benefits of CGM time in range metrics as predictive of long-  
37 term vascular outcomes [2] and as an indicator of glucose management or estimated hemoglobin  
38 A1c (HbA1c) [3], CGM use will likely continue to increase in both research and clinical settings.  
39 Despite the increasing use of CGM for treatment and research, a standardized, free, open-source  
40 approach to data management and analysis is lacking [4].

41           CGM manufacturers use proprietary algorithms to create reports and calculate summary  
42 measures for patients and clinicians. As a result, it may be difficult to compare results obtained  
43 using different CGM devices and to understand the sources of variability that could influence  
44 CGM outcomes. In addition, research questions may require summary measures that are not  
45 available in accompanying reports (e.g., use of a different cut-point for hyperglycemia).  
46 Furthermore, use of the summary values provided by each CGM platform sometimes requires  
47 that data be entered by hand into a database or spreadsheet prior to analysis. This is a time-  
48 consuming and error prone process that will benefit from automation. The use of a free and open  
49 source program to analyze raw sensor glucose values will enable researchers to define their own  
50 variables of interest and standardize calculation of summary measures across different CGM  
51 devices.

52           There have already been a few attempts to develop such systems, including the EasyGV  
53 macro-enabled Excel workbook [5], AGP Report ([agpreport.org](http://agpreport.org)), and Tidepool ([tidepool.org](http://tidepool.org)).  
54 However, there are reports suggesting that EasyGV poorly matches other calculations of mean

55 amplitude of glycemic excursion (MAGE) [6], and it does not permit the various definitions of a  
56 significant excursion (i.e. greater than 1 standard deviation (SD), 2 SDs, etc.). Although  
57 Tidepool appears to be an excellent option for patients and clinicians, it is not free for use in  
58 research, and many smaller investigator-initiated studies cannot afford the additional expense.  
59 Also, their open source code requires significant coding knowledge in multiple programming  
60 languages which limits accessibility and widespread use.

61 To address this need, we have developed a package written entirely in the statistical  
62 programming language R (R Foundation for Statistical Computing, Vienna, Austria). The  
63 package currently works with data from Diasend ([www.diasend.com](http://www.diasend.com)), Dexcom  
64 ([www.dexcom.com](http://www.dexcom.com)), iPro 2 (<http://professional.medtronicdiabetes.com/ipro2-professional-cgm>),  
65 Libre ([www.freestylelibre.us](http://www.freestylelibre.us)), and Carelink ([www.medtronicdiabetes.com/products/carelink-](http://www.medtronicdiabetes.com/products/carelink-personal-diabetes-software)  
66 [personal-diabetes-software](http://www.medtronicdiabetes.com/products/carelink-personal-diabetes-software)), with plans to add support for other platforms as CGM technology  
67 advances. Additionally, data can be manually formatted to work with these functions if  
68 necessary. The package is available on The Comprehensive R Archive Network (CRAN) under  
69 the name ‘cgmanalysis’ and the source code can be found at  
70 <https://github.com/childhealthbiostatistics/R-Packages>, which allows for version control and  
71 forking if users need to alter functionality, and includes a short user guide for those with limited  
72 R experience.

73

## 74 **Summary Measures of Glycemia**

75 Although CGM is not a new technology, there is still debate regarding the advantages  
76 and disadvantages of various CGM metrics for use in clinical care and as research outcomes. The  
77 American Diabetes Association (ADA) recently proposed a set of key metrics for CGM analysis

78 [7], all of which are calculated by our code, in addition to the glucose management index (GMI)  
79 [3], time in range [2], and other variables proposed by Hernandez et al.[8]. An easy method to  
80 calculate these important summary variables from a variety of sources of CGM data has the  
81 potential to contribute to the standardization of the use of these metrics. A list of summary  
82 variables produced by our default code is available in **Table 1**, and **Table 2** provides  
83 comparisons between the package and proprietary software. The code can be easily modified to  
84 include further variables of interest, to be released in future version updates. Further, because the  
85 package is open source, individual users can create their own modifications.

86

## 87 **Methods**

### 88 **Package Design**

89 Our package consists of three simple functions: `cleandata()`, `cgmvariables()`, and  
90 `cgmreport()`. The data cleaning function iterates through a directory of CGM data exports and  
91 produces new files that then serve as input to the CGM variable calculator and the CGM report  
92 generator. The initial directory can contain files from different sources, as the function identifies  
93 the relevant timestamp and glucose values for each file format. By default, the cleaning function  
94 will fill in gaps in glucose data less than 20 minutes long using linear interpolation. It will also  
95 remove 24-hour periods containing gaps larger than 20 minutes, so that there will be an equal  
96 number of daytime and nighttime values, important for calculating some variables, such as AUC.  
97 The user can specify a different maximum gap to fill by interpolation and can also choose  
98 whether to remove days with larger gaps. Ideally, the CGM data should be exported and then  
99 cleaned using this package, and not manually edited. However, if a file does require manual data

100 editing, these functions will work on the three-column format detailed in the package  
 101 documentation.

102       Once the data have been cleaned, the CGM variables described in **Table 1** are calculated  
 103 using the `cgmvariables()` function. By default, blood glucose must be above a threshold for at  
 104 least 35 minutes or below a threshold for at least 10 minutes to count as an excursion, but these  
 105 parameters can be changed by the user if necessary. Likewise, daytime (e.g. for daytime vs.  
 106 nighttime AUC or maximum glucose) is defined as 6:00 to 22:00 by default, but these can be set  
 107 depending on user needs. MAGE is calculated using Baghurst’s algorithm [9], which we have  
 108 coded in R. By default, the function includes blood glucose excursions greater than 1 SD from  
 109 the mean in calculation of MAGE, but there are options for 1.5 SD and 2 SD as well.

110 **Table 1: Summary Measures of Glycemia**

| CGM Variable                       | Definition                                                                                                      |
|------------------------------------|-----------------------------------------------------------------------------------------------------------------|
| <code>percent_cgm_wear</code>      | The number of sensor readings as a percentage of the number of potential readings (given time worn).            |
| <code>average_sensor</code>        | Mean of all sensor glucose values                                                                               |
| <code>estimated_a1c</code>         | Estimated HbA1c based on the equation: $(46.7 + \text{average glucose in mg/dL}) / 28.7[1]$                     |
| <code>gmi</code>                   | Glucose management indicator based on the equation: $3.31 + (0.02392 \times \text{average glucose in mg/dL})^7$ |
| <code>q1_sensor</code>             | First quartile sensor glucose value                                                                             |
| <code>median_sensor</code>         | Median sensor glucose value                                                                                     |
| <code>q3_sensor</code>             | Third quartile sensor glucose value                                                                             |
| <code>standard_deviation</code>    | Standard deviation of all sensor glucose values                                                                 |
| <code>cv</code>                    | Coefficient of variation of all sensor glucose values (SD/mean)                                                 |
| <code>min_sensor</code>            | Minimum of all sensor glucose values                                                                            |
| <code>max_sensor</code>            | Maximum of all sensor glucose values                                                                            |
| <code>excursions_over_***</code>   | The number of local glucose peaks with an amplitude greater than *** mg/dL                                      |
| <code>min_spent_over_***</code>    | The total length of time that sensor glucose was at or above *** mg/dL                                          |
| <code>percent_time_over_***</code> | Minutes spent above *** mg/dL, as a                                                                             |

|                            |                                                                                                                                                  |
|----------------------------|--------------------------------------------------------------------------------------------------------------------------------------------------|
|                            | percentage of the total time CGM was worn                                                                                                        |
| avg_excur_over_***_per_day | The number of glucose peaks above *** mg/dL averaged per 24-hour period of CGM wear                                                              |
| min_spent_under_**         | The total length of time that sensor glucose was at or below ** mg/dL                                                                            |
| percent_time_under_**      | Minutes spent below ** mg/dL, as a percentage of the total time CGM was worn                                                                     |
| min_spent_70_180           | Minutes spent in the range 70 – 180 mg/dL (inclusive)                                                                                            |
| percent_time_70_180        | Minutes spent in the range 70 – 180 mg/dL (inclusive), as a percentage of the total time CGM was worn                                            |
| daytime_***                | *** of all sensor glucose values during specified daytime hours                                                                                  |
| nighttime_***              | *** of all sensor glucose values during specified nighttime hours                                                                                |
| auc                        | Approximate area under the sensor glucose curve, calculated using the trapezoidal rule                                                           |
| r_mage                     | MAGE calculated according to Baghurst's algorithm                                                                                                |
| j_index                    | Calculated based on the equation: $0.324 \times (\text{average glucose in mg/dL} + \text{standard deviation of glucose levels})^2$ <sup>11</sup> |
| conga                      | Continuous overall net glycemic action, default n = 1 hour <sup>11</sup>                                                                         |
| modd                       | Mean of daily differences                                                                                                                        |
| lbgi                       | Low blood glucose index                                                                                                                          |
| hbgi                       | High blood glucose index                                                                                                                         |

111  
 112 Our code was originally written to produce data tables for upload to a Research  
 113 Electronic Data Capture (REDCap) database [10], which influenced the selection of variable  
 114 names in the final output. These names can be changed in the code itself or by simply editing the  
 115 function's output. These variables are stored in separate columns of a new data frame (the  
 116 function's output), with each record identified by the patient ID.

117 In addition to producing calculated variables, our package can also plot CGM data in a  
 118 few ways. First, the function concatenates all the CGM data in the specified directory into one  
 119 data table and plots the aggregate data in the style of the standard AGP report

120 (<http://www.agpreport.org>), the aggregate daily overlay (ADO). This method uses Tukey  
121 smoothing after rounding each timepoint to the nearest 10-minute mark, then plots the median,  
122 inter-quartile range, and 5 and 95 percentiles at each time of day (with plans to add more options  
123 in the future). The package also produces a similar aggregate plot with a Loess-smoothed  
124 (locally estimated scatterplot smoothing) average overlaid on points representing every single  
125 glucose value. For smaller data sets, this type of plot gives a meaningful overview of daily  
126 glucose trends. Finally, the third type of plot uses a Loess-smoothed average for each patient  
127 with glucose values color-coded by participant.

## 128 **Comparison of cgmanalysis package and proprietary software**

129 Our functions were compared to proprietary CGM software using clinically collected  
130 data from iPro 2, Carelink 670G, Dexcom Clarity, and Diasend. The data were exported from  
131 each platform, formatted using the `cleandata()` function, then summarized using the  
132 `cgmvariables()` and `cgmreport()` functions. The data were not cleaned prior to plotting and  
133 summary variable calculation, and summary variable parameters were altered from default (e.g.  
134 defining an excursion as 15 minutes above or below threshold for iPro 2 data) in order to better  
135 match the CGM results. Because each CGM device provides different and limited summary  
136 variables, we were only able to compare a small subset of our package's output and were not  
137 able to directly test more complex variables, such as MAGE or CONGA.

138

## 139 **Results**

140 **Fig 1** is an example of the ADO plot made using approximately 25,000 simulated CGM  
141 values, and **Fig 2** is the version of the ADO with Loess smoothing, using the same data as in **Fig**  
142 **1**. **Fig 3** is the patient-specific plot, made with a subset of the simulated data.



143 **Fig 1: Aggregate Daily Overlay (Tukey Smoothing)**

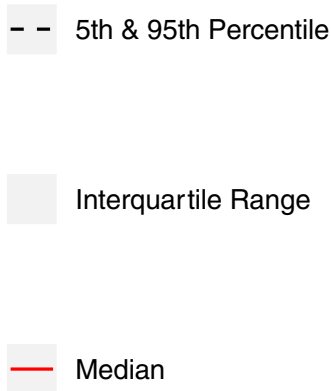

144

145 **Fig 2: Aggregate Daily Overlay (Loess Smoothing)**

146 **Fig 3: Daily Overlay per Subject (LOESS Smoothing)**

## Subject ID

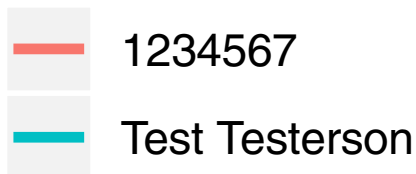

147

148 **Table 2** shows the results of summary variable comparisons between four different  
149 proprietary CGM devices and our cgmanalysis package. Most of the differences in these  
150 comparisons are small and the result of rounding. Overall the package appears to be capable of  
151 reproducing proprietary calculations when run with non-default settings, although in the  
152 comparison to the iPro 2, there was a difference of 1 high excursion.

153

154 **Table 2: Summary Variable Comparisons**

155 A. iPro 2 software (high excursion defined as > 140 mg/dL for 15 minutes, low defined as <  
156 60 mg/dL for 15 minutes)

|                   | cgmanalysis | iPro |
|-------------------|-------------|------|
| # Sensor Values   | 2000        | 2000 |
| Highest           | 282         | 282  |
| Lowest            | 70          | 70   |
| Average           | 126.87      | 127  |
| Standard Dev      | 30.79       | 31   |
| # High Excursions | 31          | 32   |
| # Low Excursions  | 0           | 0    |
| % Time Above 140  | 24.85       | 24   |
| % Time Below 60   | 0           | 0    |

157  
158 B. Carelink 670G

|              | cgmanalysis | Carelink<br>670G |
|--------------|-------------|------------------|
| Average      | 123.65      | 124              |
| Standard Dev | 37.53       | 38               |

159  
160 C. Dexcom Clarity

|               | cgmanalysis | Dexcom<br>Clarity |
|---------------|-------------|-------------------|
| Average       | 175.68      | 176               |
| Standard Dev  | 67.10       | 68                |
| Time in Range | 55.66       | 56                |

161  
162 D. Diasend

|                  | cgmanalysis | Diasend |
|------------------|-------------|---------|
| # Sensor Values  | 184         | 184     |
| Highest          | 411         | 411     |
| Lowest           | 54          | 54      |
| Average          | 193.23      | 193     |
| Standard Dev     | 89.67       | 89      |
| Values above 200 | 44.57%      | 44.57%  |

163

164 **Figs 4a-d** show the comparisons of the graphical outputs produced by the proprietary  
165 software and the cgmanalysis package. In the graphs produced by the cgmanalysis package,  
166 glycemic patterns at each hour of the day are clearly visible and match the CGM device outputs  
167 well. However, some of the proprietary software appear to apply different smoothing  
168 algorithms, resulting in slightly different patterns across time.

169 **Fig 4a: “cgmanalysis” Package Plots Compared to iPro 2 Daily Overlay**

170 Clockwise from top left: Aggregate Daily Overlay (Tukey Smoothing), Aggregate Daily Overlay  
171 (Loess Smoothing), iPro 2 Daily Overlay

172  
173 **Fig 4a Tukey AGP (Top Left) Legend**

-- 5th & 95th Percentile

Interquartile Range

Median

174  
175

176 **Fig 4b: “cgmanalysis” Package Plots Compared to Carelink 670G Daily Overlay**

177  
178 Clockwise from top left: Aggregate Daily Overlay (Tukey Smoothing), Aggregate Daily Overlay  
179 (Loess Smoothing), Carelink 670G Daily Overlay

180  
181 **Fig 4b Tukey AGP (Top Left) Legend**

-- 5th & 95th Percentile

Interquartile Range

Median

182

183

184 **Fig 4c: “cgmanalysis” Package Plots Compared to Dexcom Clarity Daily Overlay**

185  
186 Clockwise from top left: Aggregate Daily Overlay (Tukey Smoothing), Aggregate Daily Overlay  
187 (Loess Smoothing), Dexcom Daily Overlay  
188

189 **Fig 4c Tukey AGP (Top Left) Legend**

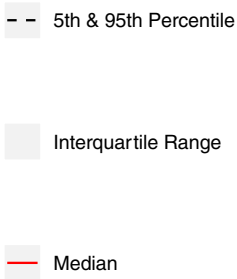

190

191 **Fig 4c Dexcom Clarity (Bottom) Legend**

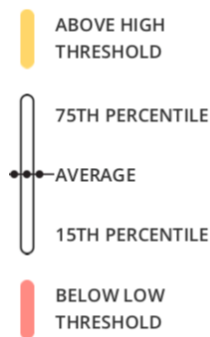

192

193 **Fig 4d Tukey AGP (Top Left) Legend**

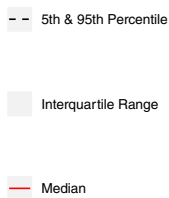

194

195 **Fig 4d Tukey AGP (Bottom) Legend**

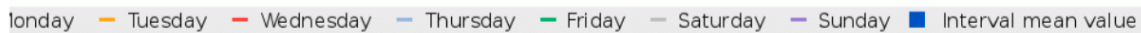

196

197

198 **Fig 4d: “cgmanalysis” Package Plots Compared to Diasend Daily Overlay**

199

200 Clockwise from top left: Aggregate Daily Overlay (Tukey Smoothing), Aggregate Daily Overlay  
201 (Loess Smoothing), Diasend Daily Overlay

202

## 203 **Discussion**

204           The summary variables produced by the cgmanalysis package match those from the  
205 proprietary software for all platforms assessed, and differences are mainly due to rounding  
206 discrepancies. Compared to the iPro 2, the number of high excursions differed by 1. Without  
207 access to the iPro algorithms we are unable to determine why these counts disagree, but the  
208 difference is not likely of clinical significance. The graphical outputs from the cgmanalysis  
209 package are similar to the CGM device output in terms of the glycemic patterns by hour of day,  
210 although there are small differences, likely due different smoothing algorithms.

211           There are several limitations to our comparison of the cgmanalysis package to the  
212 proprietary software output. CGM devices only calculate a few summary variables, and  
213 accordingly it is difficult to test this package cohesively. Also, gold standard calculations do not  
214 exist for many of these variables, which makes verifying our results difficult. We hope that by  
215 making this package freely available and open source, these limitations will be minimized  
216 through widespread testing. Perhaps the greatest limitation to the software itself is the lack of an  
217 easy to use graphical user interface (GUI), which may prevent its use by clinicians with limited  
218 programming experience. We have included detailed documentation in the CRAN package, as  
219 well as a new-user guide on GitHub, but using the package still requires enough technical  
220 knowledge that it may be inaccessible to some users. None of the authors are software engineers,  
221 and the package is undoubtedly less efficient than it could be. Again, we hope that the free and  
222 open source nature will contribute significantly to improving the code over time, both as a result  
223 of outside contributions and our own planned updates.

224           In conclusion, our software provides a standardized, free, open-source approach to  
225 manage and analyze CGM data, enabling sharing of data across technology platforms,  
226 collaboration between research groups, and more effective use of the growing pool of CGM data.  
227 The advantage of using R functions rather than licensed statistical software, or a web-based or  
228 desktop application, is that R is freely available and open source. Clinicians or investigators can  
229 alter the code according to their needs and anyone can contribute to the development of the  
230 program, as CGM research and technology advance.

231

232

## 233 **References**

234

- 235 1. DeSalvo DJ, Miller KM, Hermann JM, Maahs DM, Hofer SE, Clements, MA, et al.  
236 Continuous glucose monitoring and glycemic control among youth with type 1 diabetes:  
237 International comparison from the T1D Exchange and DPV Initiative. *Pediatr Diabetes*.  
238 2018;19(7):1271-1275.
  - 239 2. Beck RW, Bergenstal RM, Riddlesworth TD, Kollman C, Li Z, Brown AS, et al.  
240 Validation of Time in Range as an Outcome Measure for Diabetes Clinical Trials.  
241 *Diabetes Care*. 2018.
  - 242 3. Bergenstal RM, Beck RW, Close KL, Grunberger G, Sacks DB, Kowalski A, et al.  
243 Glucose Management Indicator (GMI): A New Term for Estimating A1C From  
244 Continuous Glucose Monitoring. *Diabetes Care*. 2018;41(11):2275-2280.
  - 245 4. Hernandez TL, Barbour LA. A Standard Approach to Continuous Glucose Monitor Data  
246 in Pregnancy for the Study of Fetal Growth and Infant Outcomes. *Diabetes Technology  
247 & Therapeutics*. 2013;15(2):172-179.
  - 248 5. Hill NR, Oliver NS, Choudhary P, Levy JC, Hindmarsh P, Matthews DR. Normal  
249 reference range for mean tissue glucose and glycemic variability derived from continuous  
250 glucose monitoring for subjects without diabetes in different ethnic groups. *Diabetes  
251 Technol Ther*. 2011;13(9):921-928.
  - 252 6. Sechterberger MK, Luijck YM, DeVries JH. Poor agreement of computerized calculators  
253 for mean amplitude of glycemic excursions. *Diabetes Technol Ther*. 2014;16(2):72-75.
  - 254 7. Danne T, Nimri R, Battelino T, Bergenstal RM, Close KL, DeVries JH, et al.  
255 International Consensus on Use of Continuous Glucose Monitoring. *Diabetes Care*.  
256 2017;40(12):1631-1640.
  - 257 8. Hernandez TL, Barbour LA. A standard approach to continuous glucose monitor data in  
258 pregnancy for the study of fetal growth and infant outcomes. *Diabetes Technol Ther*.  
259 2013;15(2):172-179.
  - 260 9. Baghurst PA. Calculating the mean amplitude of glycemic excursion from continuous  
261 glucose monitoring data: an automated algorithm. *Diabetes Technol Ther*.  
262 2011;13(3):296-302.
  - 263 10. Harris PA, Taylor R, Thielke R, Payne J, Gonzalez N, Conde JG. Research electronic  
264 data capture (REDCap)--a metadata-driven methodology and workflow process for  
265 providing translational research informatics support. *J Biomed Inform*. 2009;42(2):377-  
266 381.
- 267

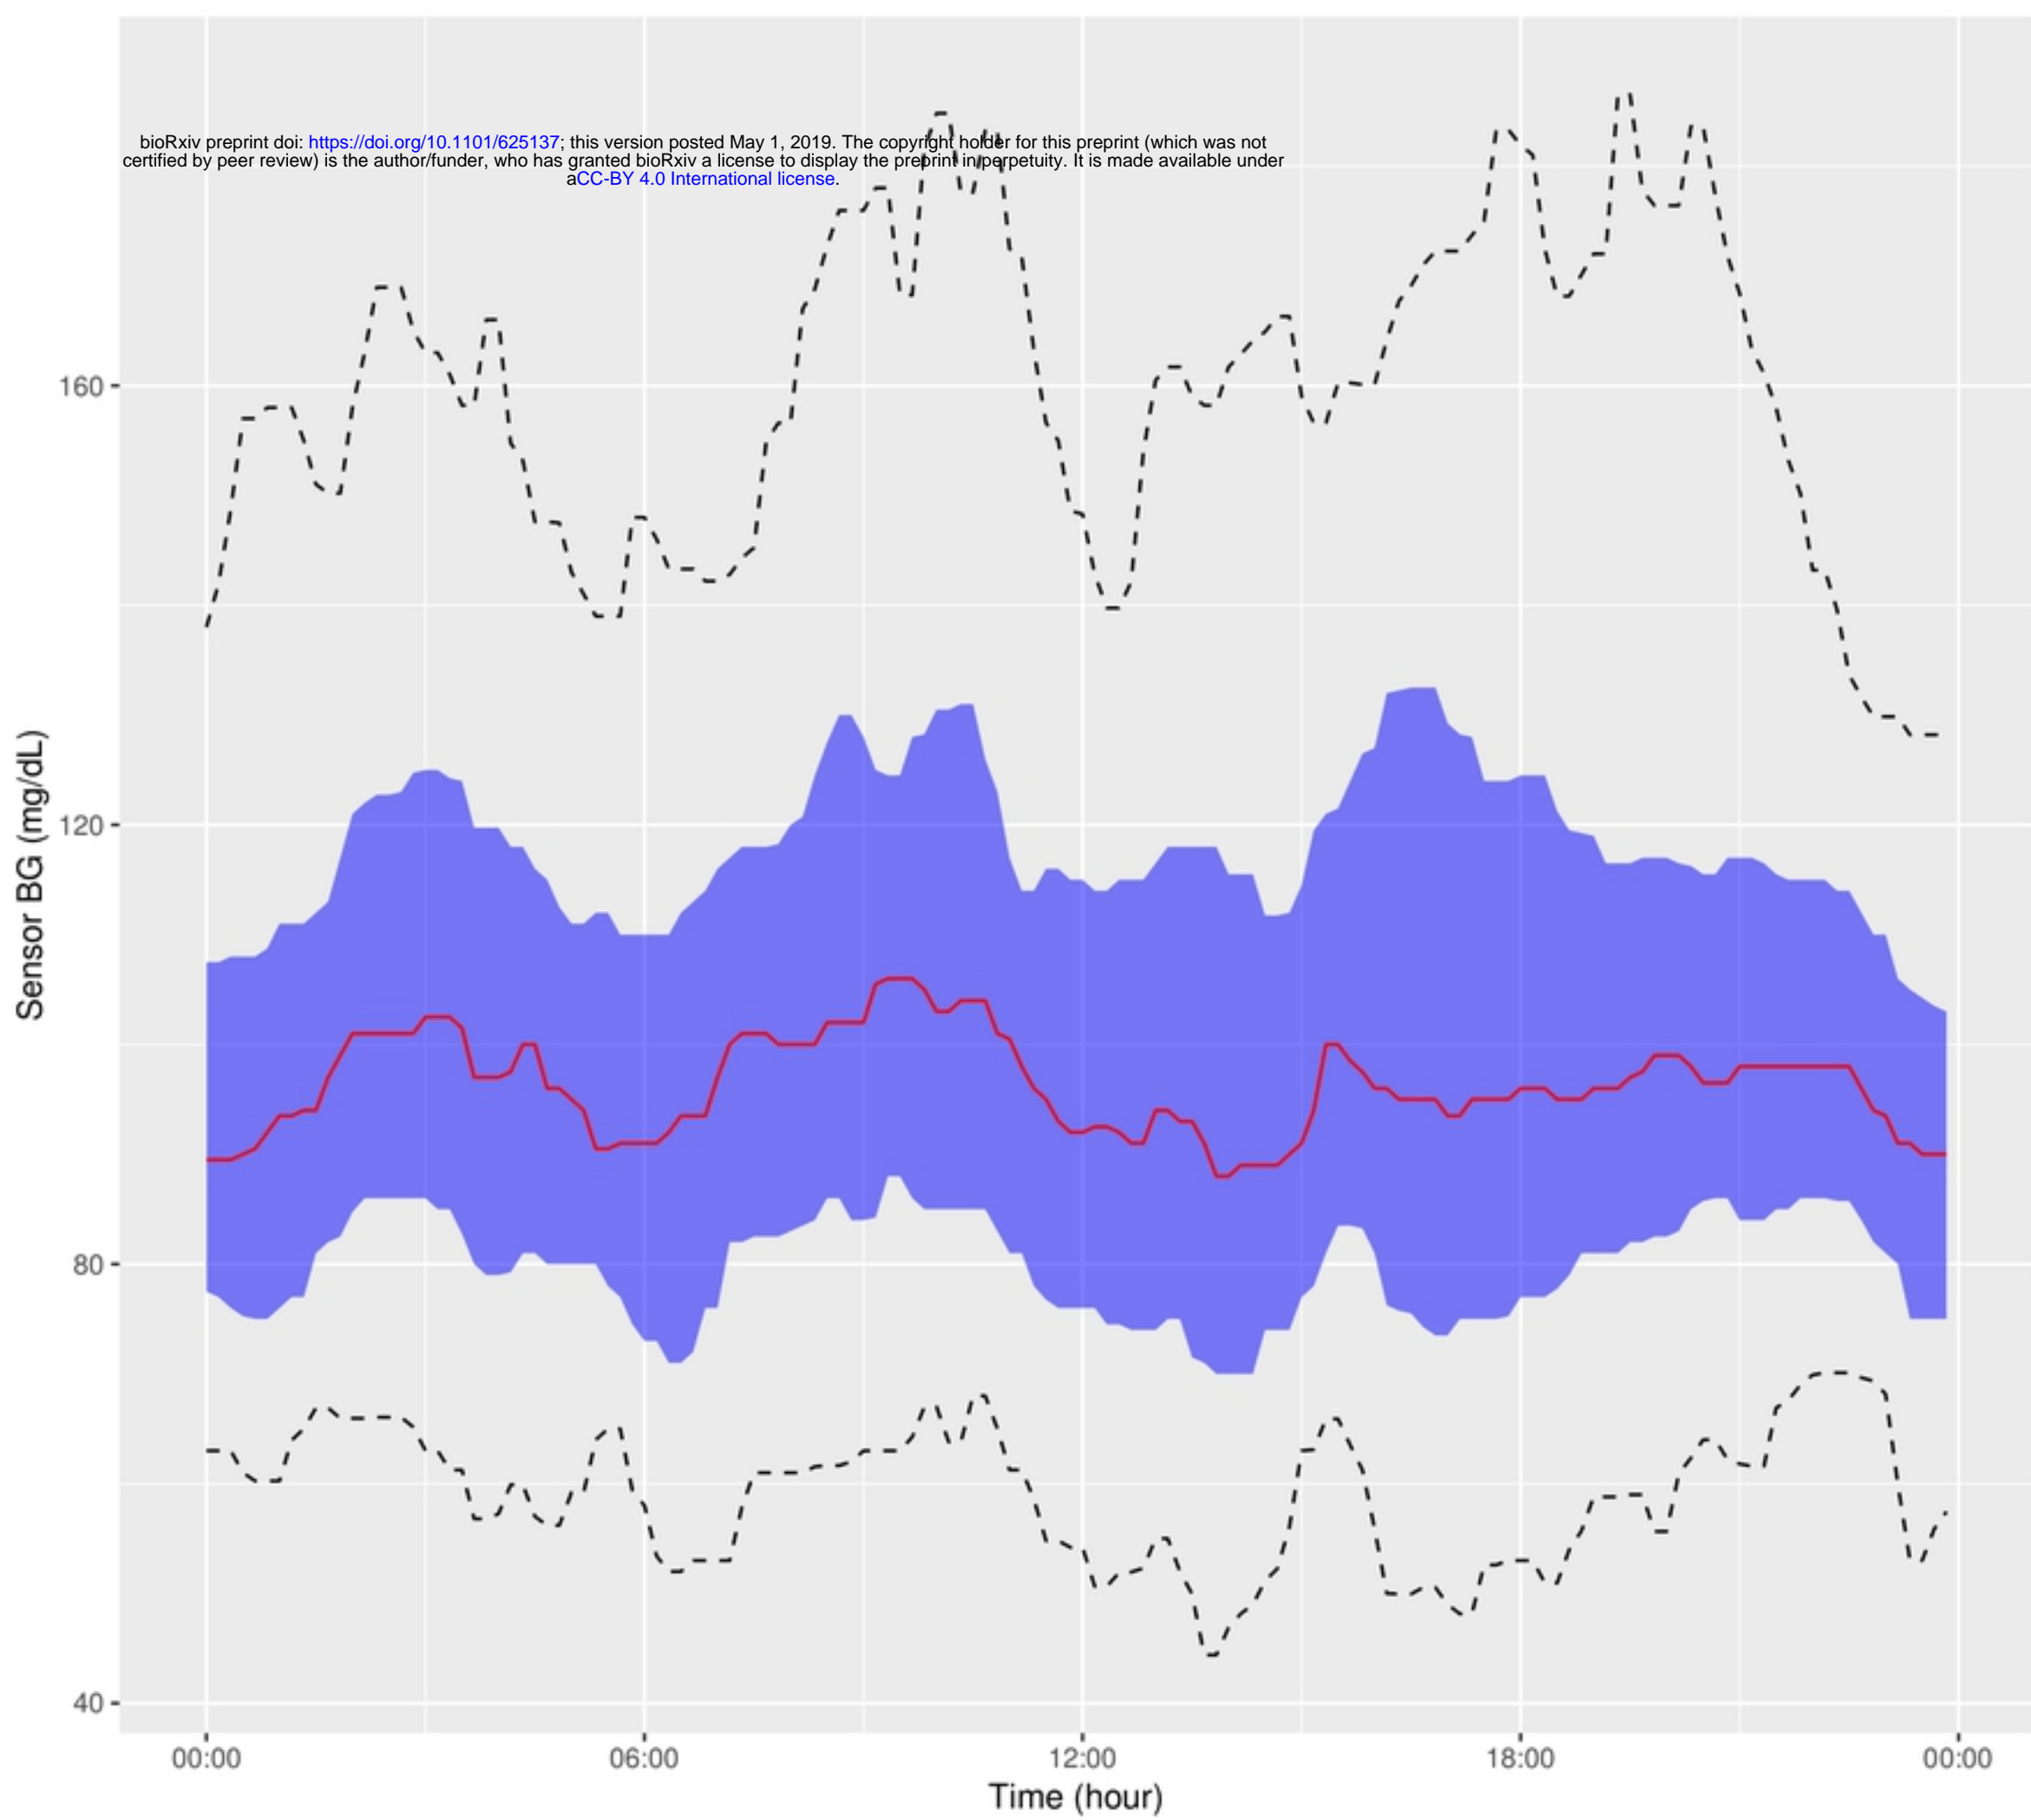

Figure 1



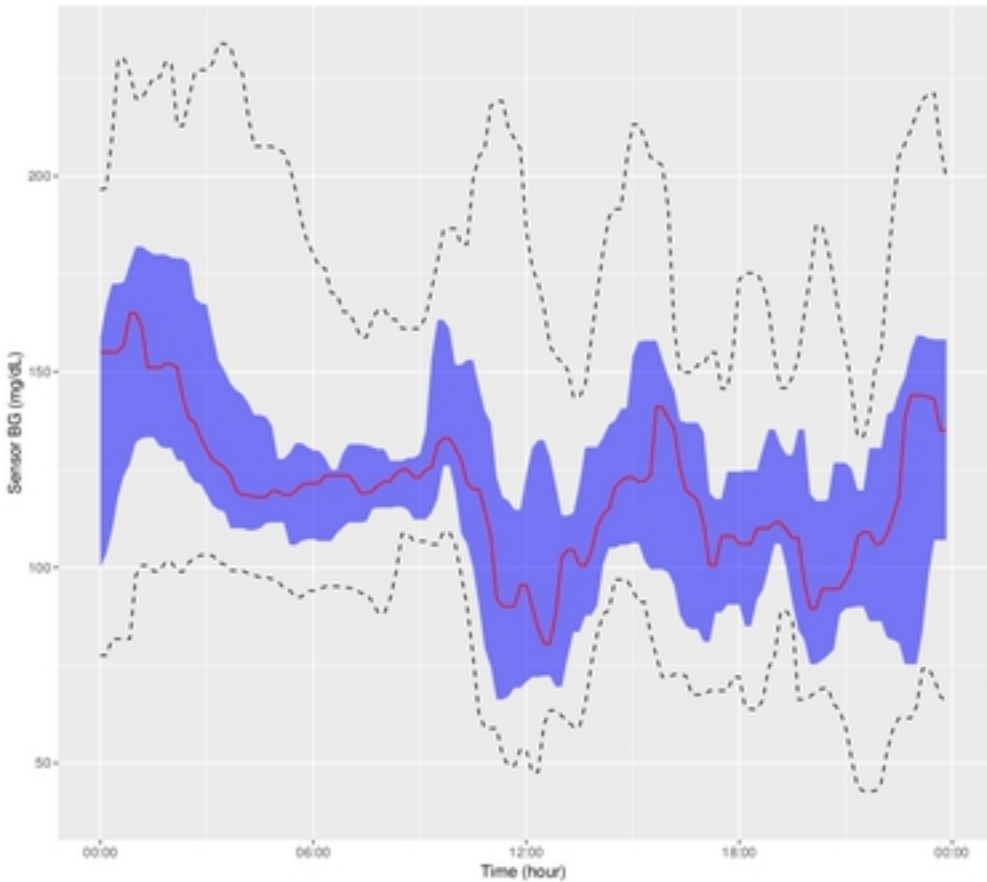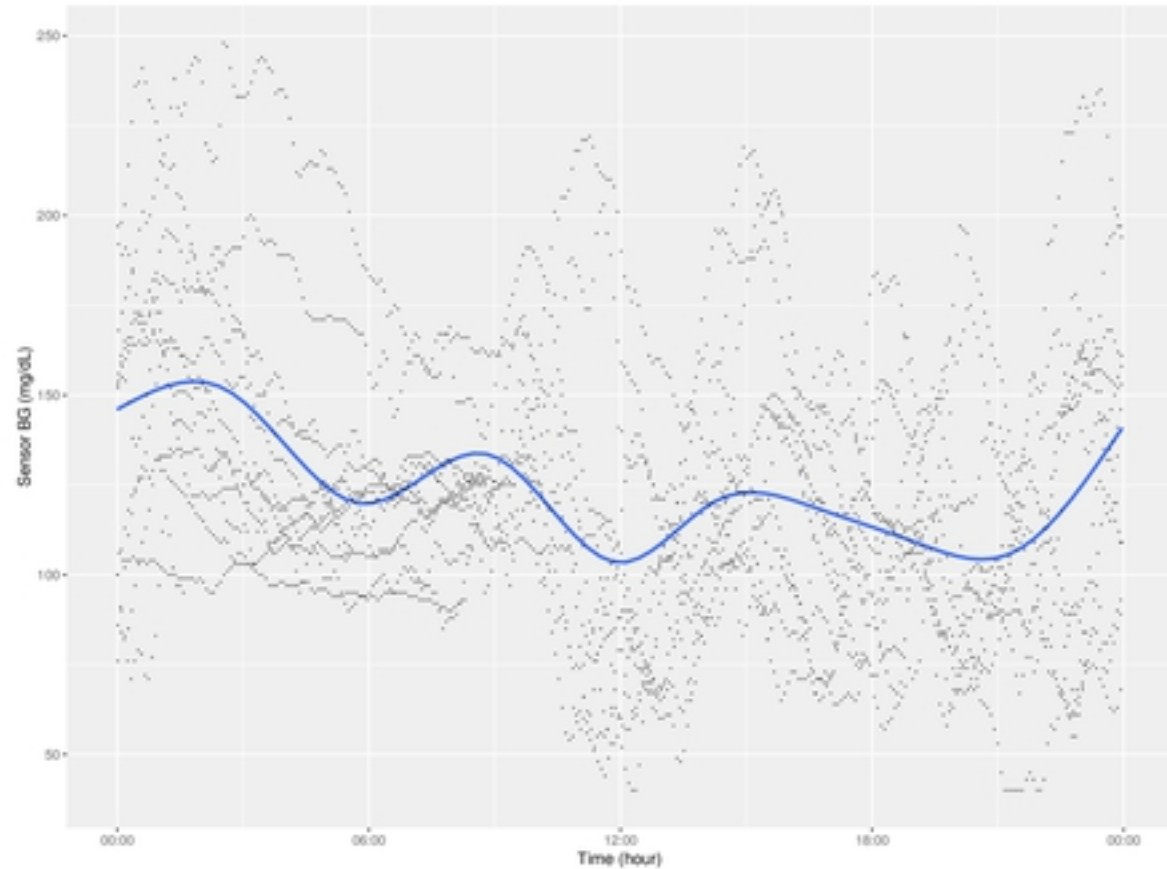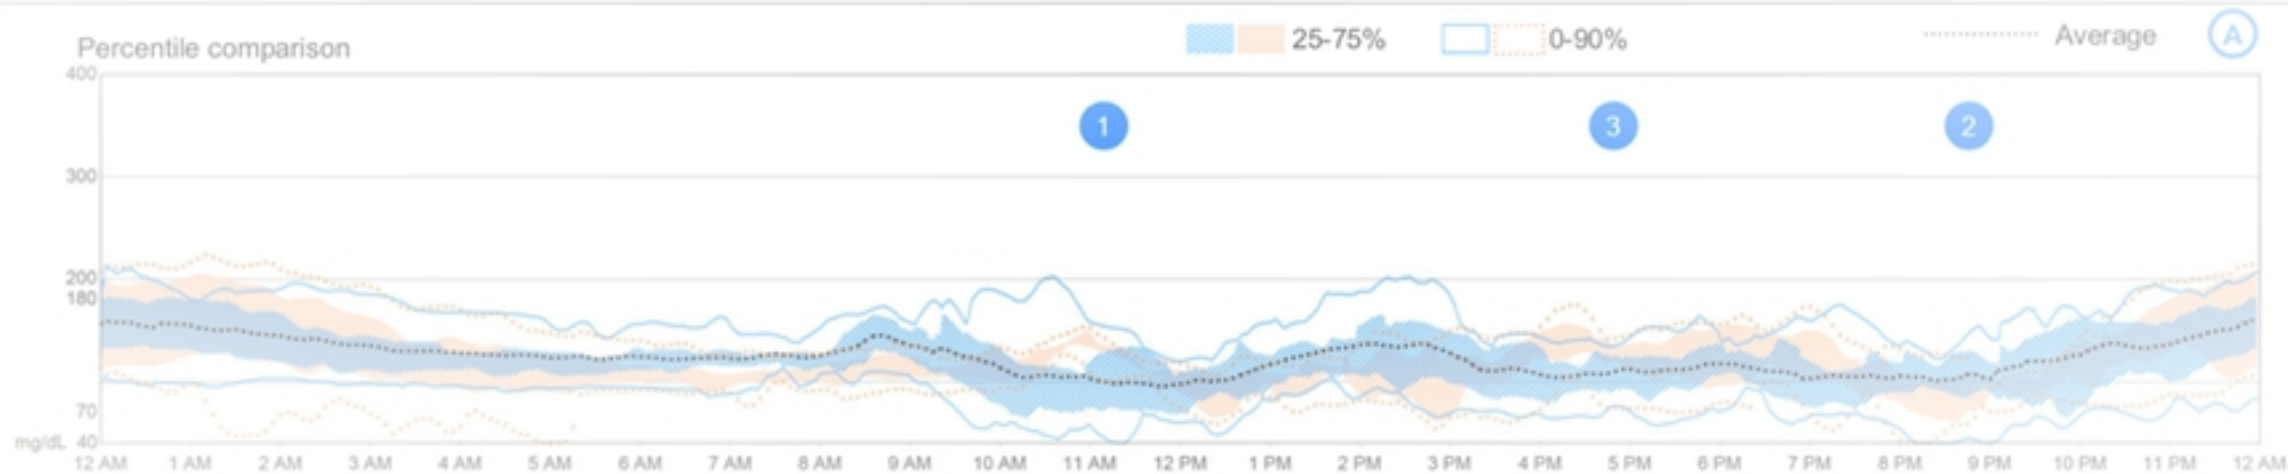

Figure 4b

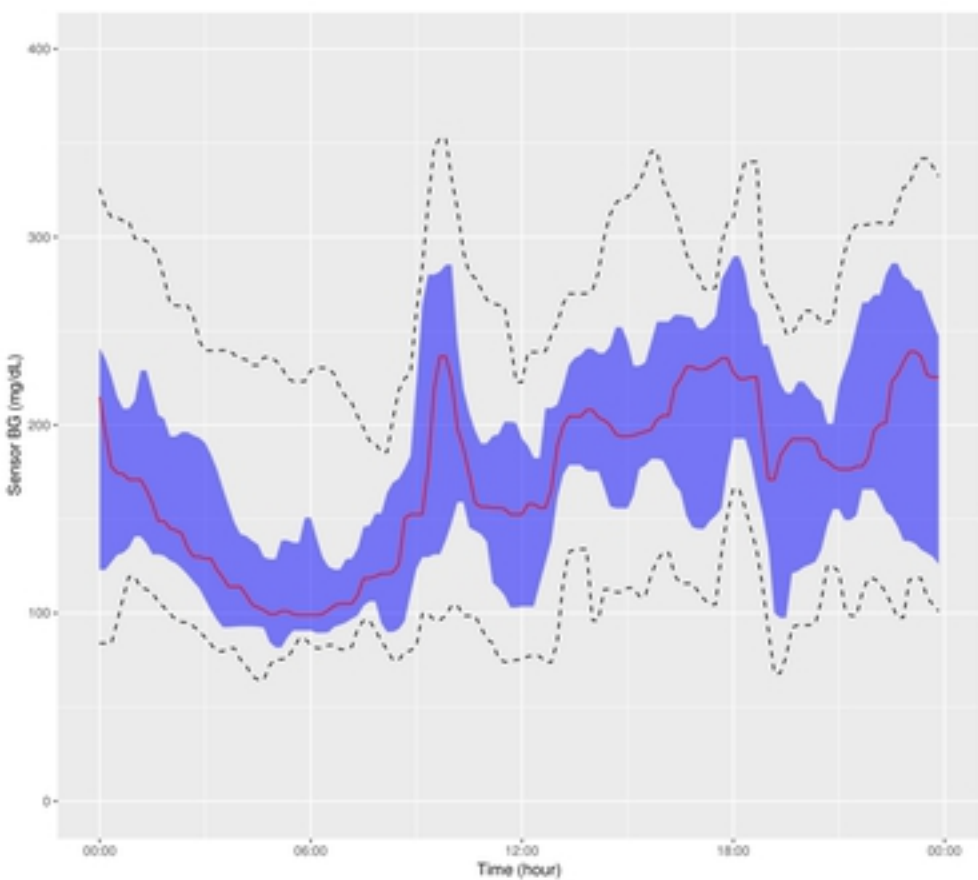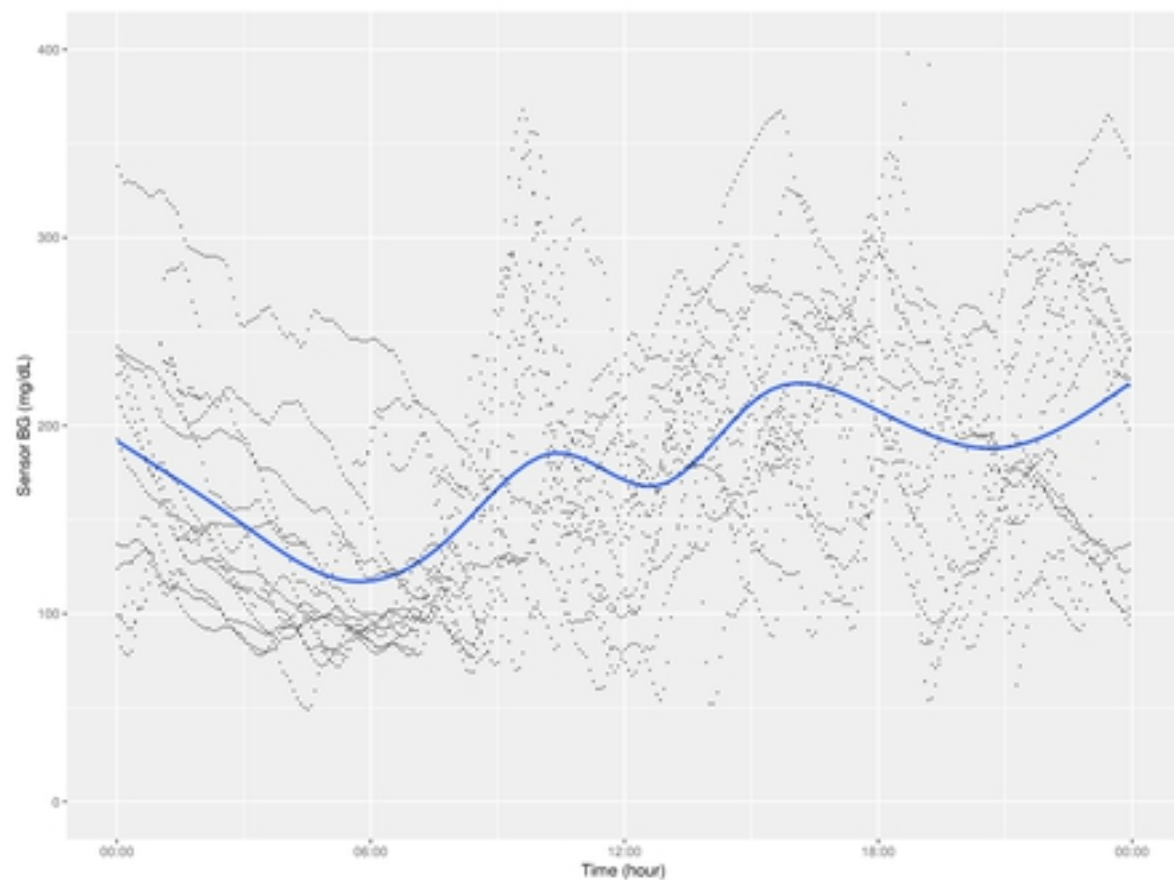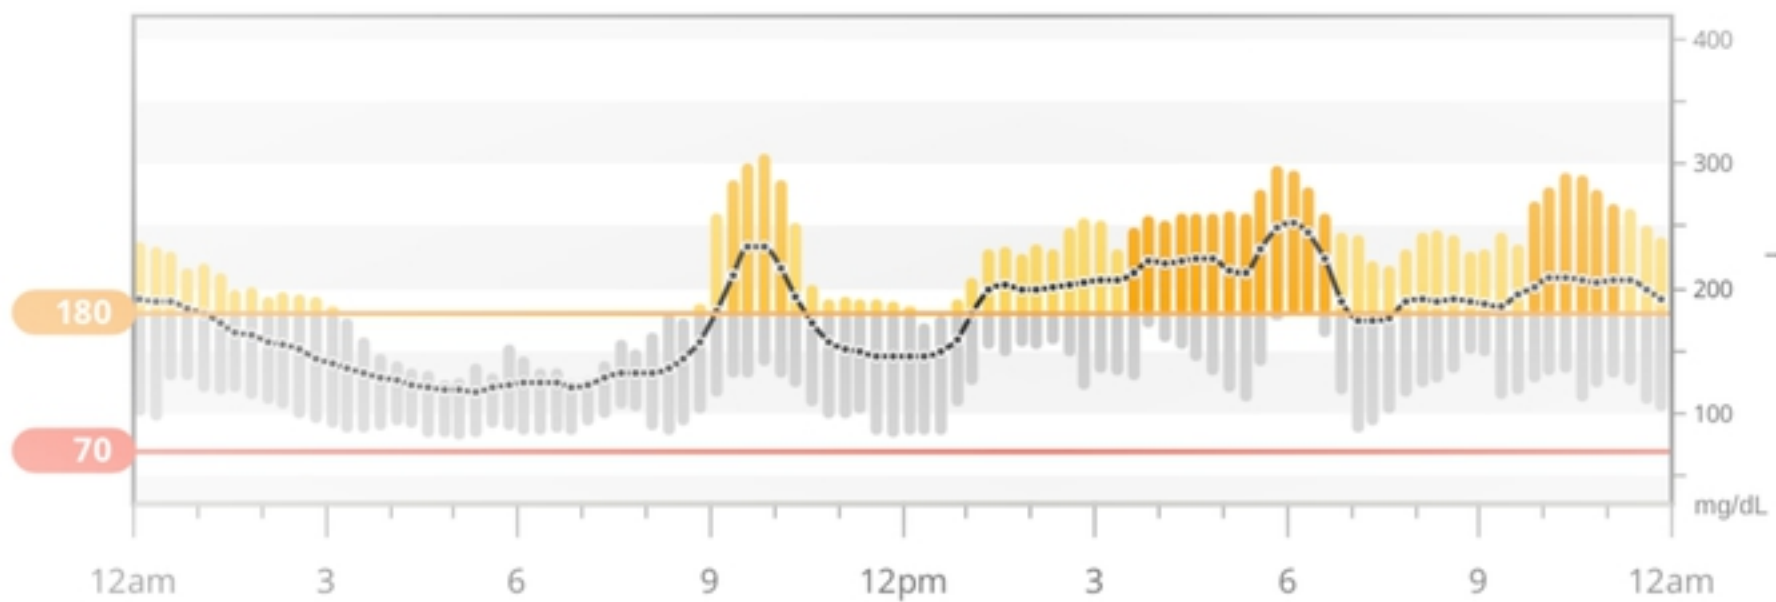

Figure 4c

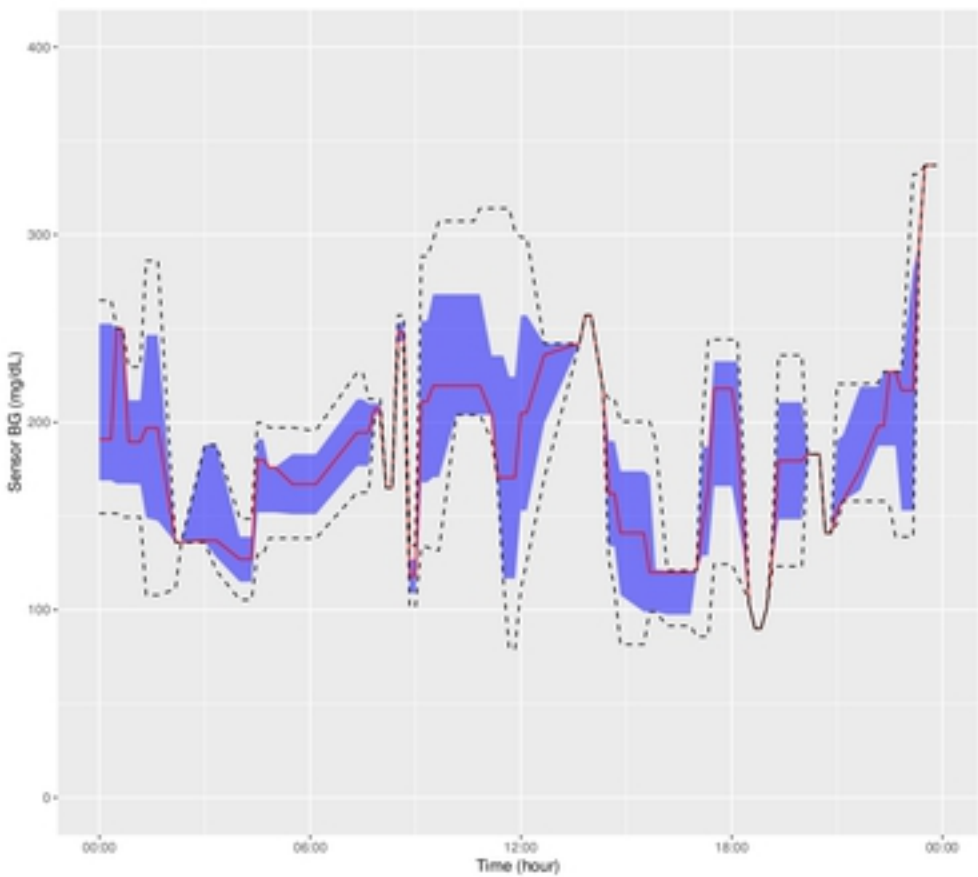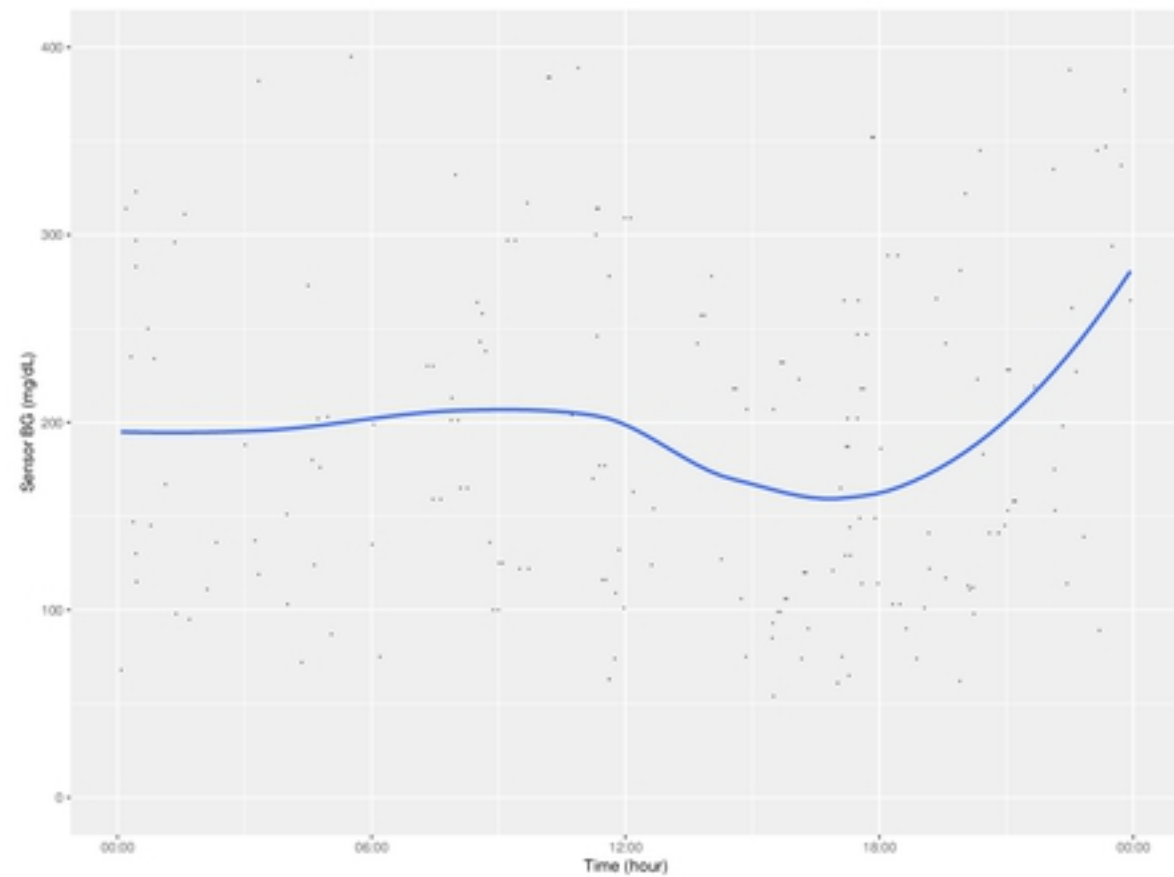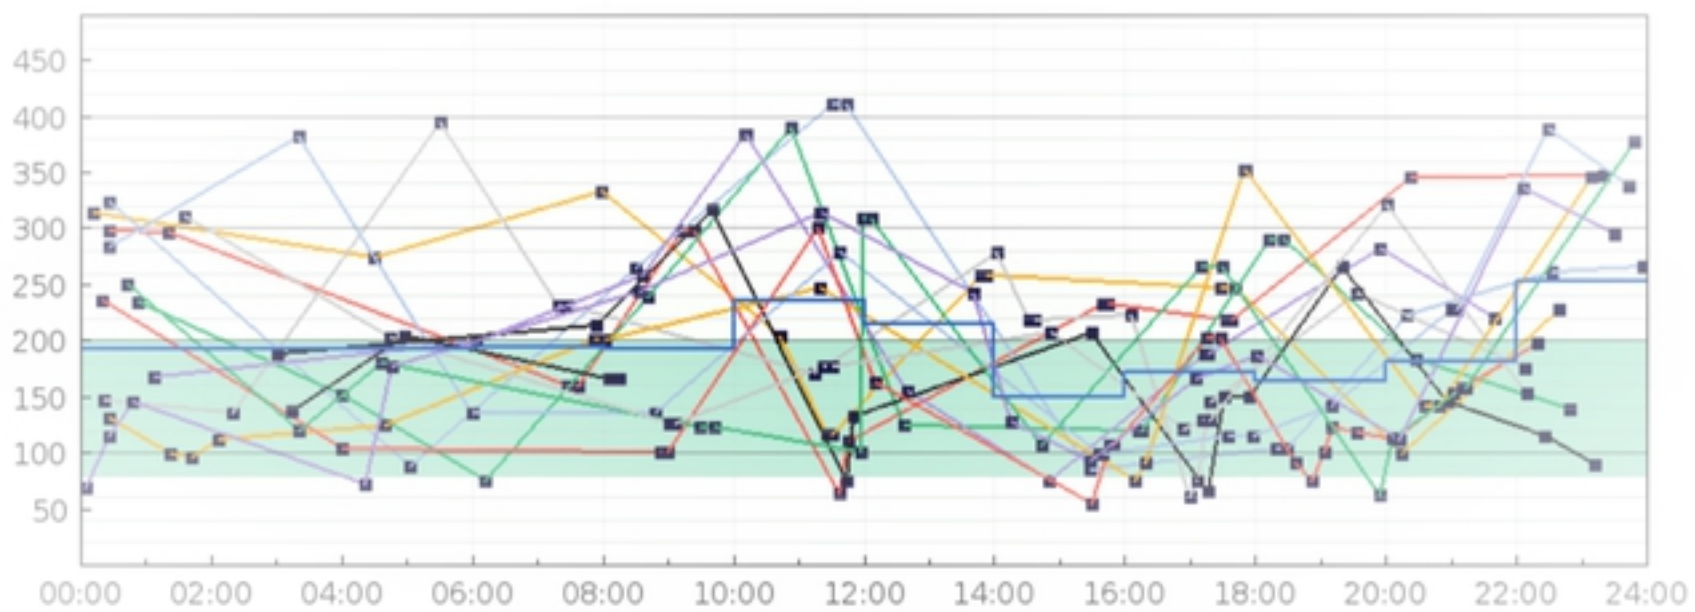

Figure 4e



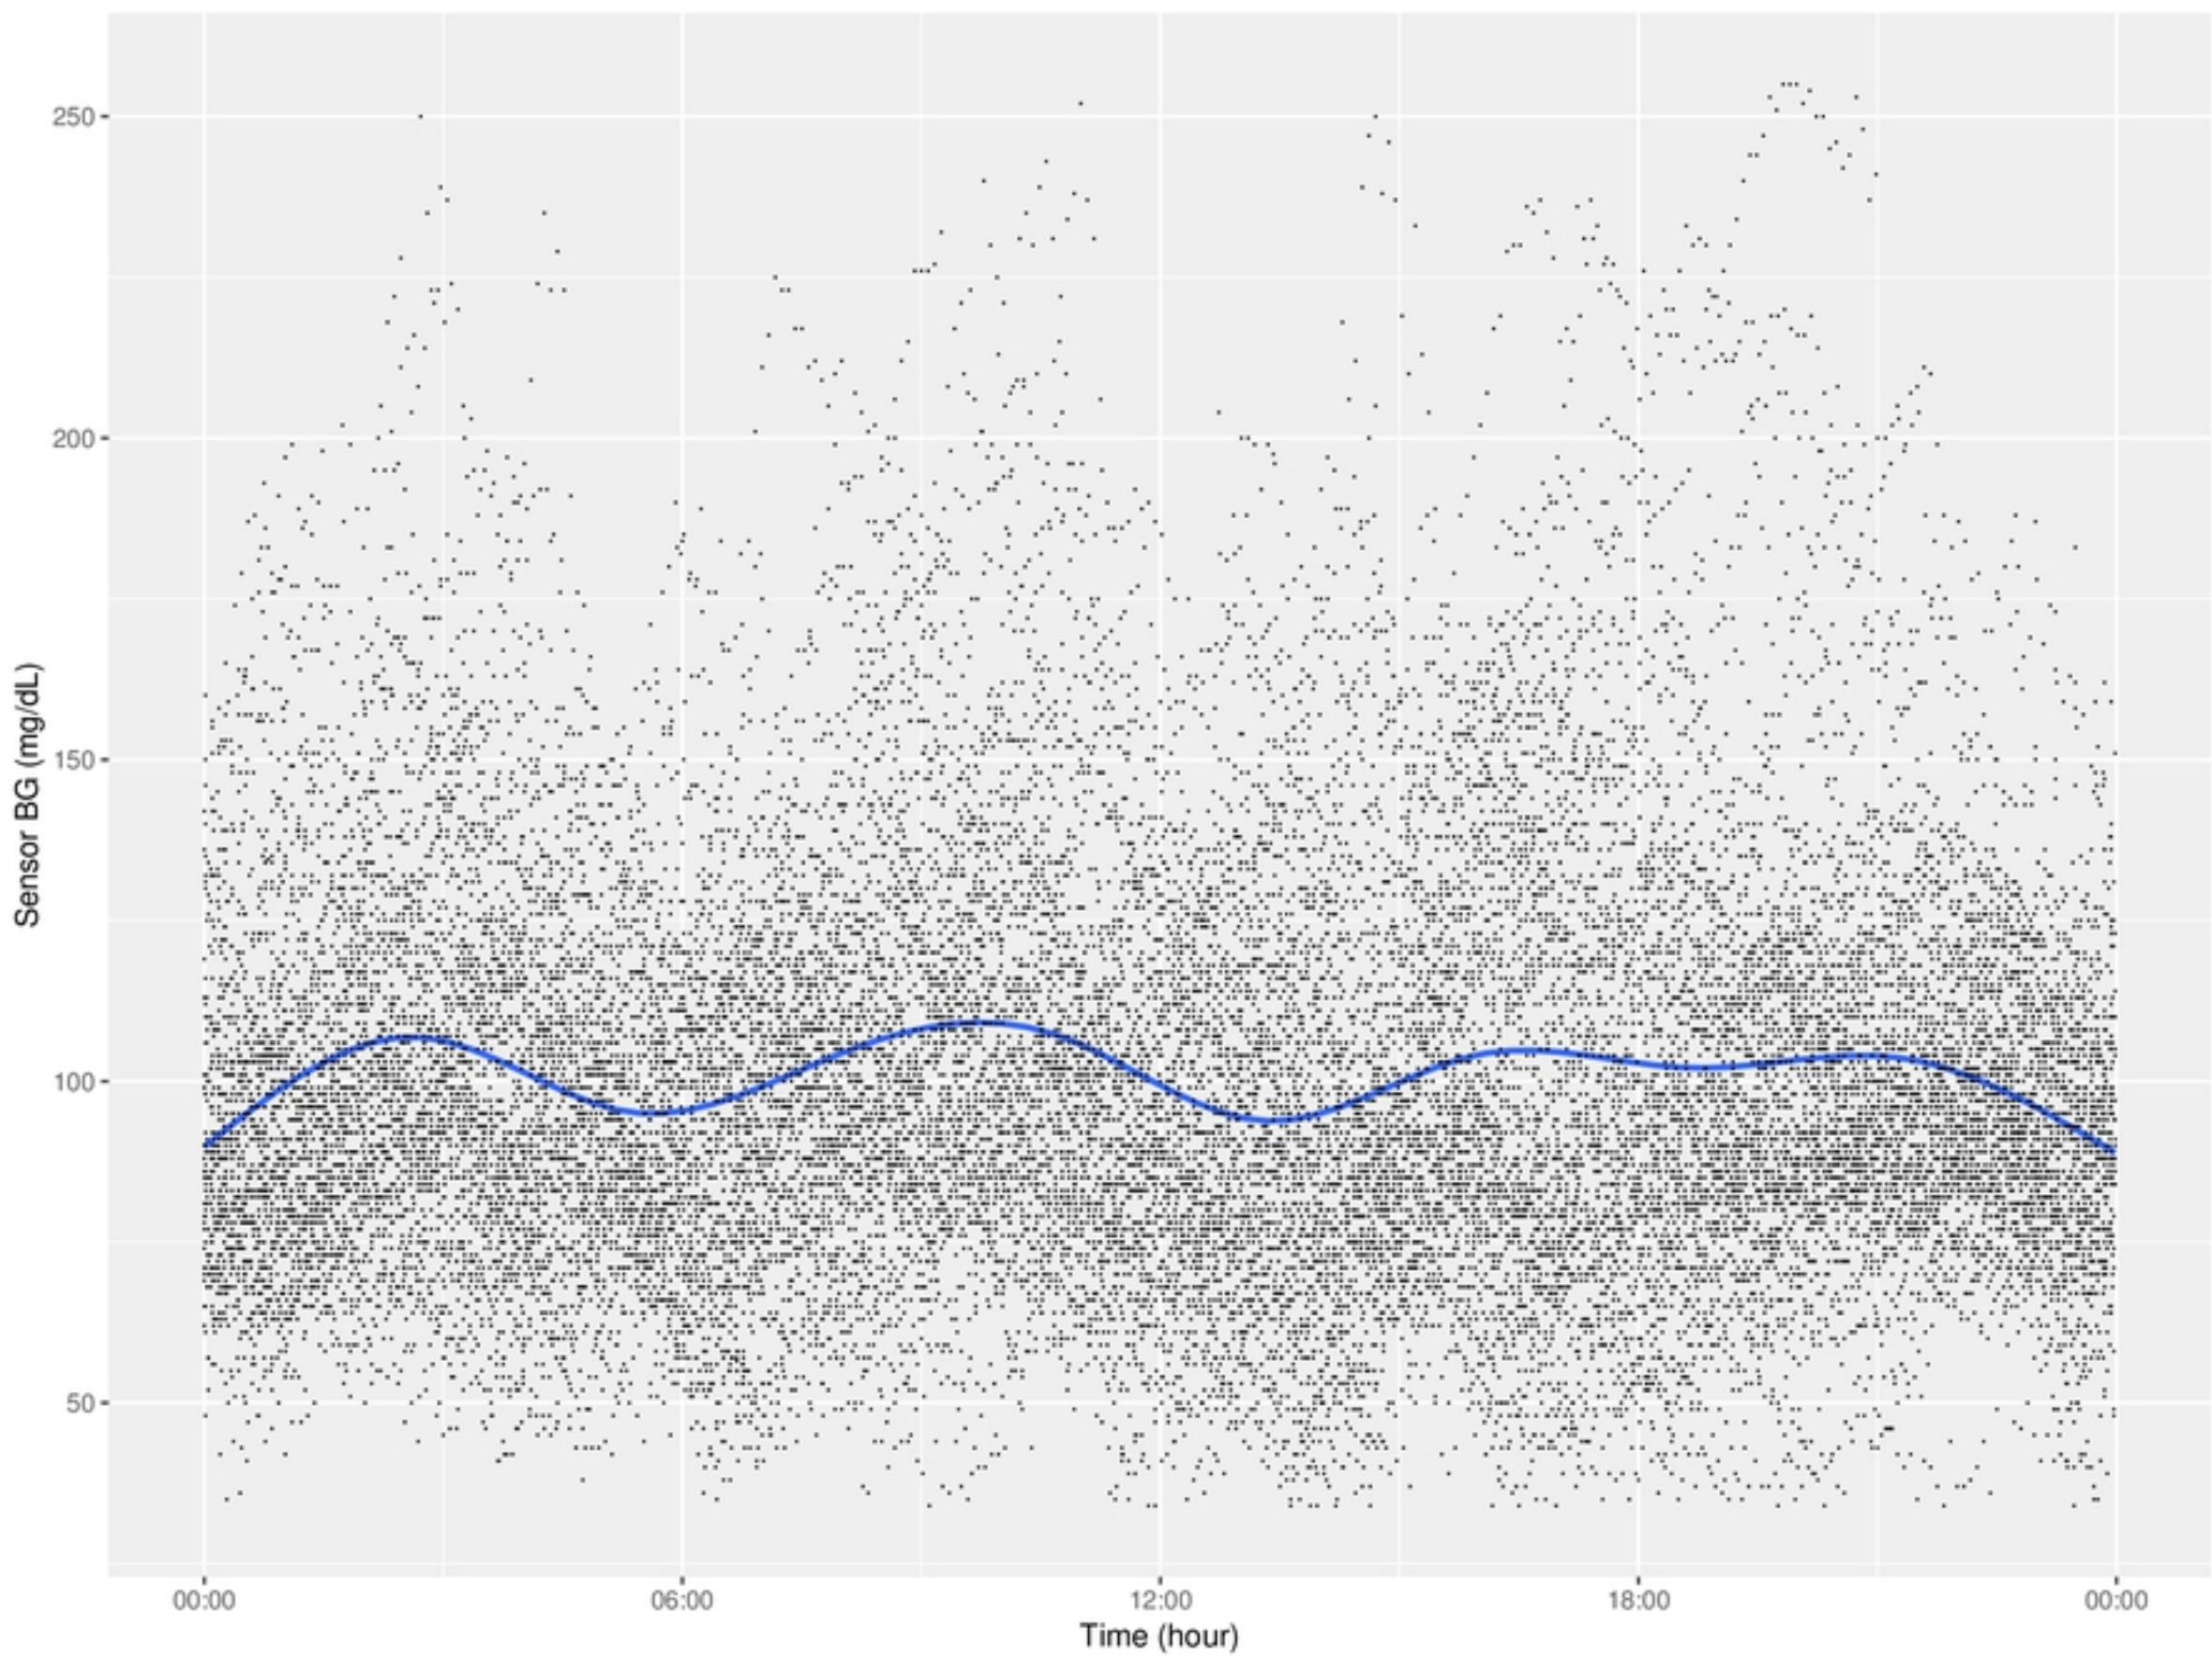

Figure 2

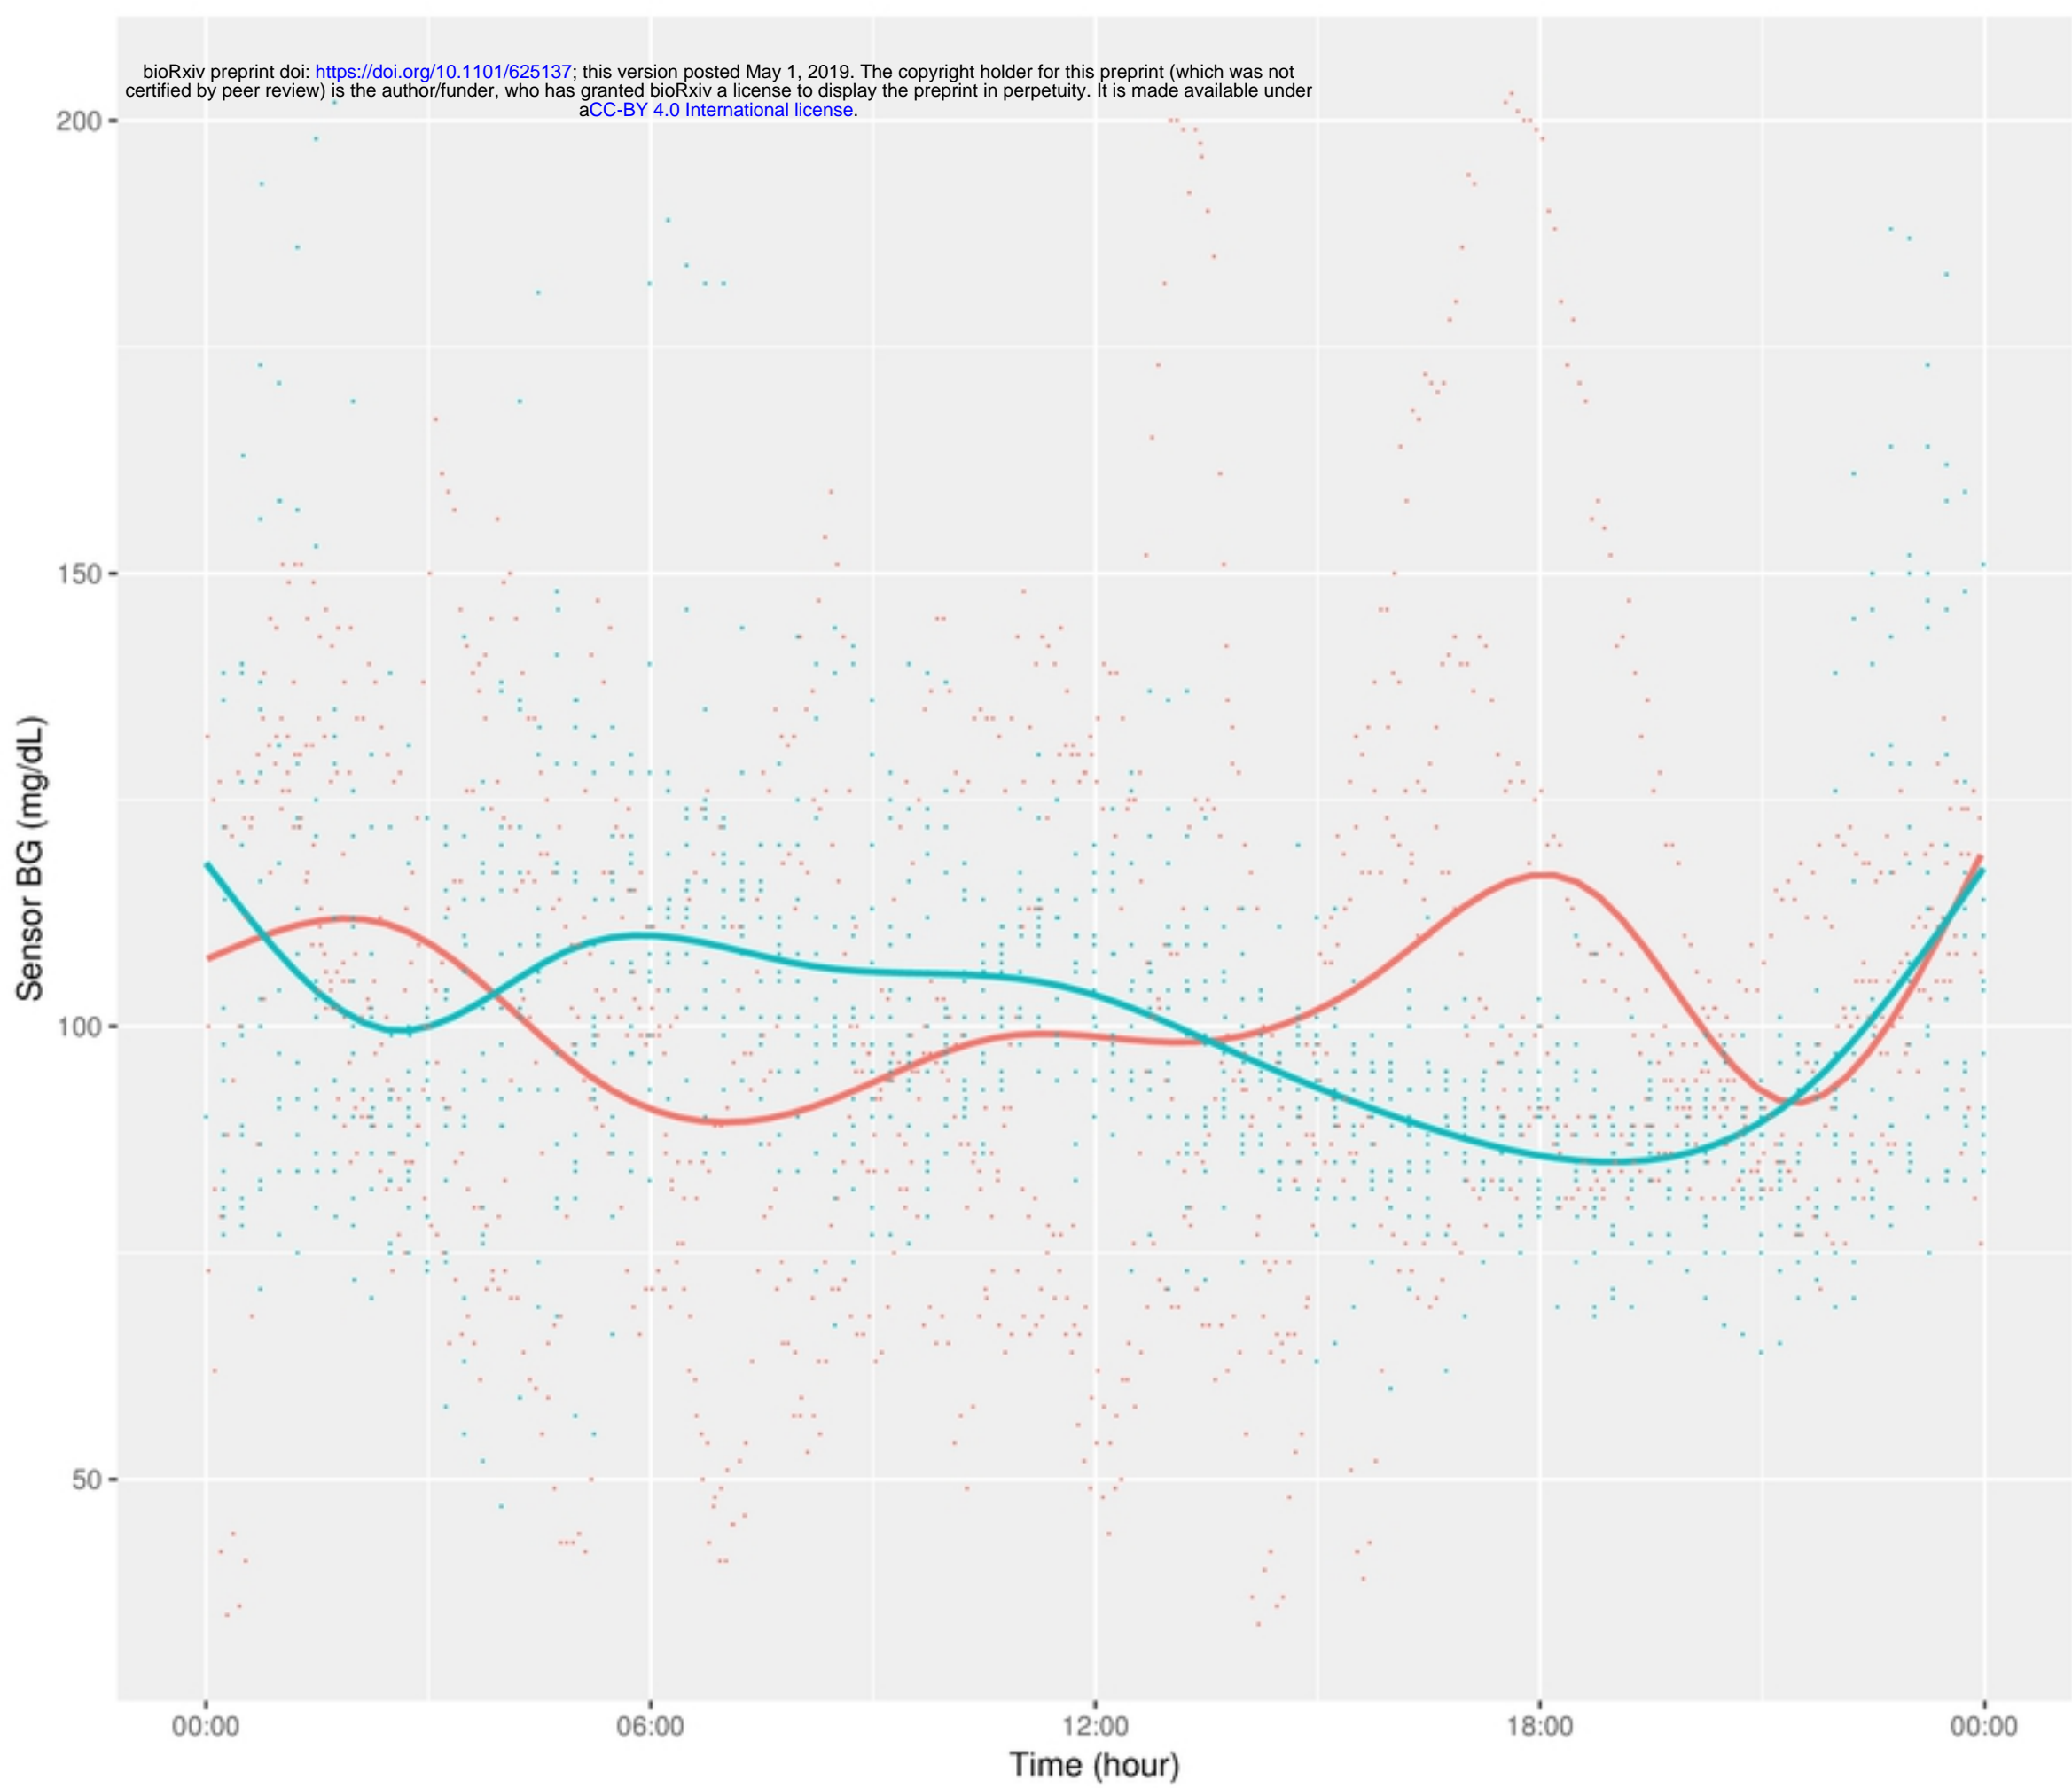

Figure 3

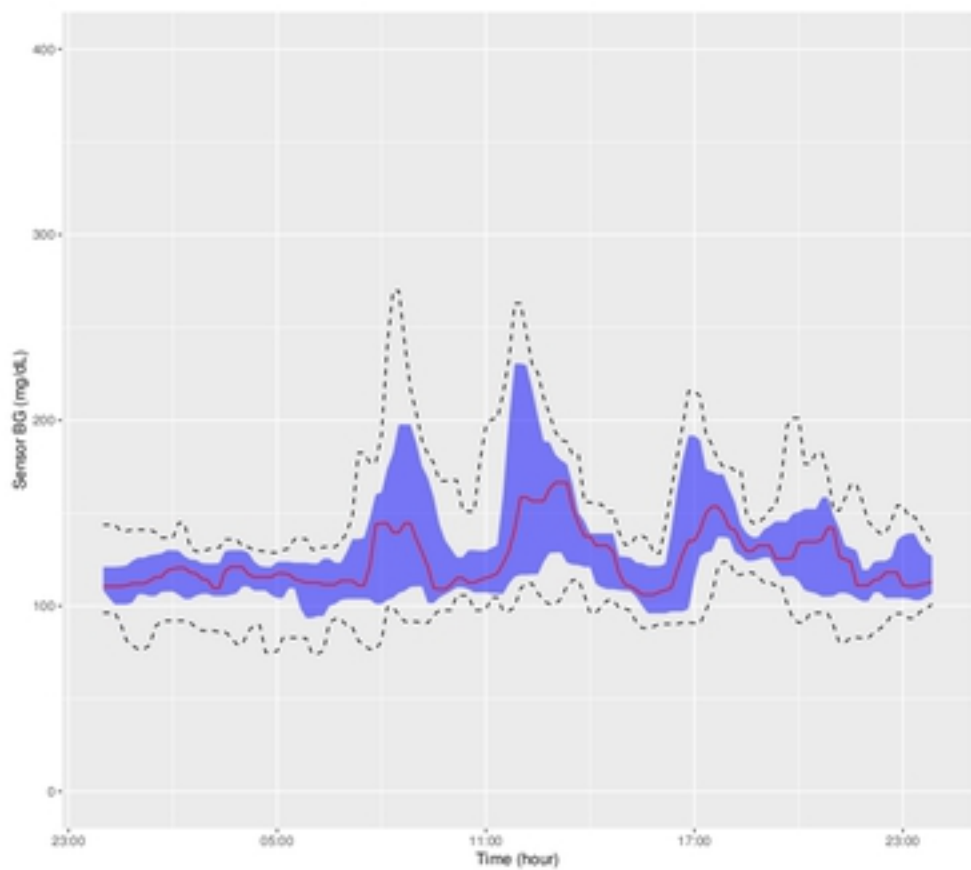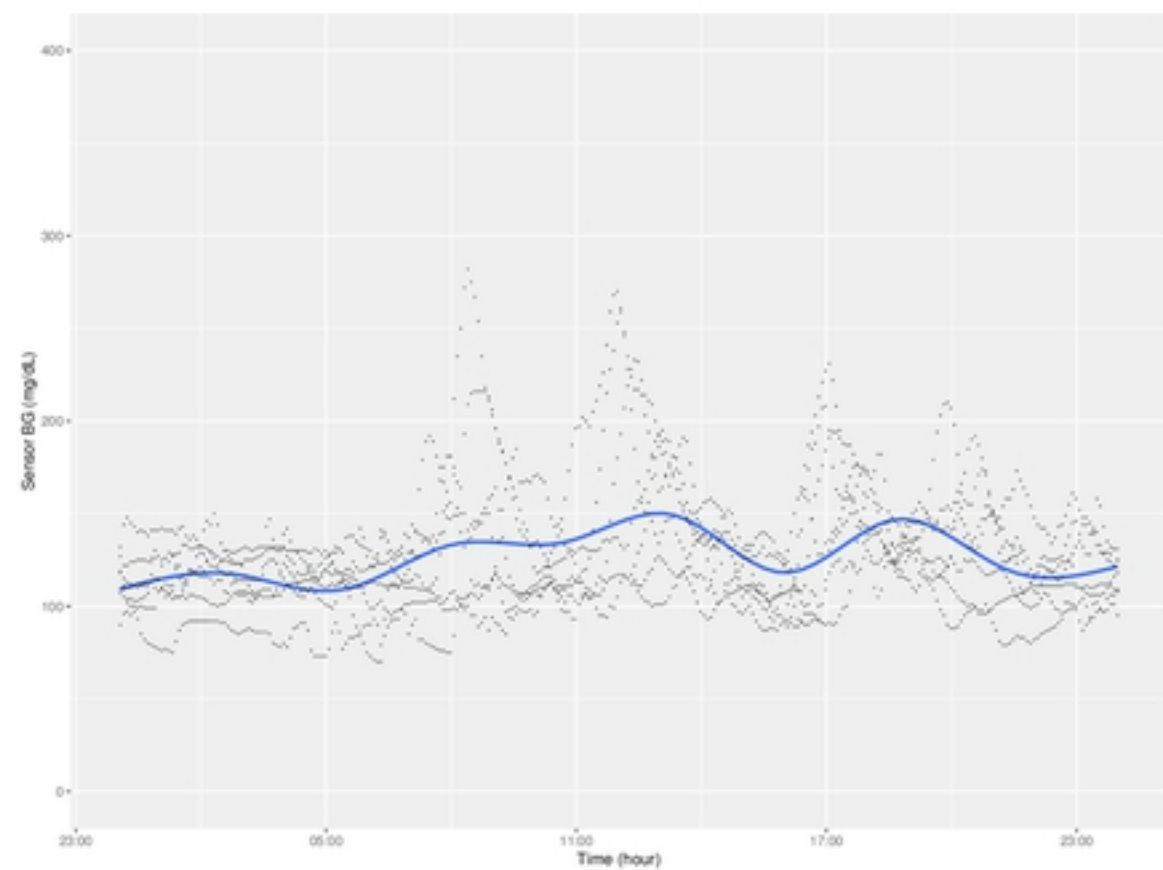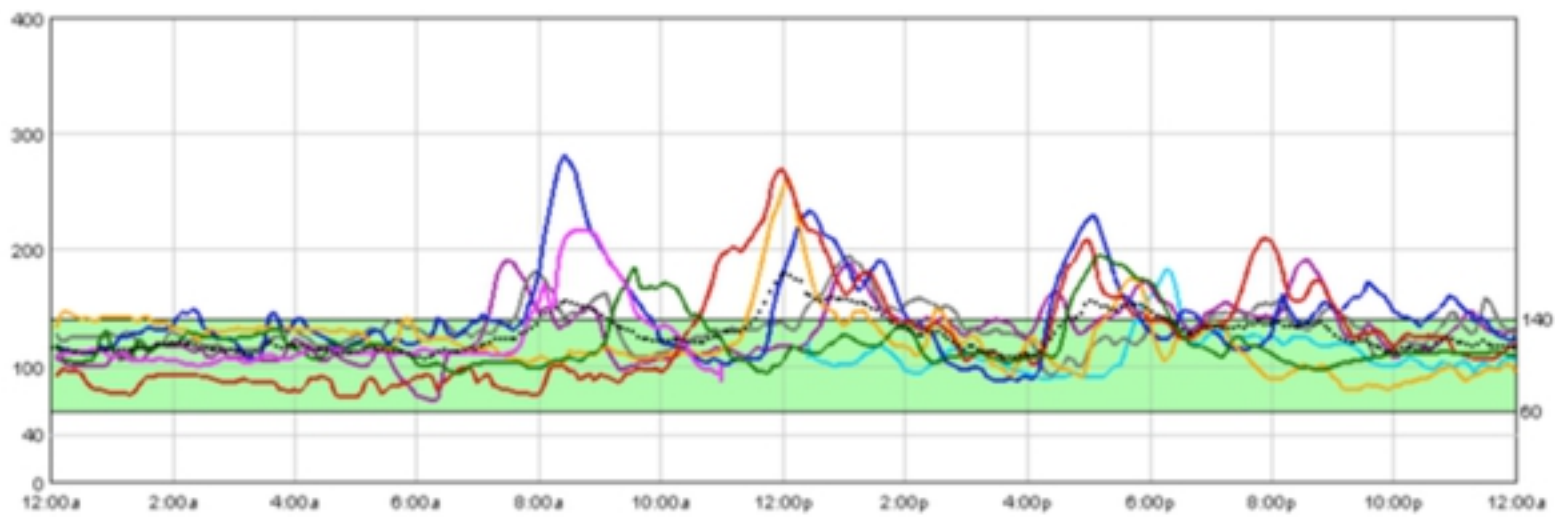

Figure 4a
